# Supplementary material for: TiO2 nanoparticles synthesized by the molten salt method as a dual functional material for dye-sensitized solar cells
Source: Royal Society of Chemistry journal article supplement (doi:10.1039/c2ra00041e), 2012-01-01
Supplement: c2ra00041e.pdf [file c2ra00041e.pdf]

## Electronic Supplementary Information (ESI)

### **TiO<sub>2</sub> Nanoparticles Synthesized by Molten Salt Method as a Dual Functional Material for Dye-Sensitized Solar Cells**

Zhu Peining <sup>a, b</sup>, Wu Yongzhi <sup>b</sup>, M. V. Reddy,<sup>c\*</sup> A. Sreekumaran Nair,<sup>b\*</sup> Peng Shengjie, N. Sharma<sup>d</sup>, V. K. Peterson<sup>d</sup>, B. V. R. Chowdari <sup>c</sup>, and S. Ramakrishna<sup>b</sup>

<sup>a</sup> Department of Mechanical Engineering, National University of Singapore, Singapore 117574, Singapore

<sup>b</sup> Healthcare and Energy Materials Laboratory, Nanoscience and Nanotechnology Initiative and Department of Mechanical Engineering, National University of Singapore, Singapore 117581, Singapore

<sup>c</sup> Department of Physics, National University of Singapore, Singapore 117542

<sup>d</sup> The Bragg Institute, Australian Nuclear Science and Technology Organisation, Locked Bag 2001, Kirrawee DC, NSW 2232, Australia

Corresponding authors: [phymvvr@nus.edu.sg](mailto:phymvvr@nus.edu.sg) (M. V. Reddy), [niansn@nus.edu.sg](mailto:niansn@nus.edu.sg) (A. S. Nair)

## ESI-1

### Experimental Details:

**(a) Fabrication of Dye-Sensitized Solar Cells:** Dye-sensitized solar cells (DSCs) were fabricated by the methods of screen-printing and doctor blading as described below: the FTO plates were first cleaned with acetone, ethanol and water successively and treated with 50 mM aq.  $\text{TiCl}_4$  solution at 70 °C for 30 min. The MSM and P25  $\text{TiO}_2$  nanoparticles respectively were made into paste with ethyl cellulose and  $\alpha$ -terpineol under controlled ratios, and fabricated on the FTO substrates by twice screen-printing and one time doctor-blading on an area of  $\sim 0.25 \text{ cm}^2$ . The films were then heated at 450 °C in air for 30 min, followed by a  $\text{TiCl}_4$  post treatment and sintered again at 450 °C for 30 min. These electrodes (of thickness  $\sim 13 \mu\text{m}$ ) were immersed in a 1:1 volume mixture of acetonitrile and tert-butanol solution of a ruthenium-based dye [ $\text{RuL}_2(\text{NCS})_2 \cdot 2\text{H}_2\text{O}$ ;  $L=2,2'$ -bipyridyl-4,4'-dicarboxylic acid (0.5 mM, N3 Solaronix)] for 24 h to allow dye attachment. The counter electrodes were prepared by spin-coating  $\text{H}_2\text{PtCl}_4$  (50 mM in isopropyl alcohol) on FTO substrates and sintering at 390 °C in air for 30 min. Acetonitrile containing 0.1 M lithium iodide, 0.03 M iodine, 0.5 M 4-tert-butylpyridine, and 0.6 M 1-propyl 2,3- dimethyl imidazolium iodide was used as the electrolyte.

**(b) Characterization:** The as-prepared MSM  $\text{TiO}_2$  nanoparticles were characterized by scanning electron microscopy (SEM, JEOL JSM-6701F microscope operated at 30 kV), high-resolution transmission electron microscopy (HR-TEM, JEOL 3010 operated at 300 kV), BET surface area (NOVA 4200E Surface Area and Pore Size Analyzer, Quantachrome, USA), X-ray powder diffraction (XRPD, Bruker-AXS D8 ADVANCE). The absorbance spectra of electrodes and the dye-desorbed solutions (by 0.02 M NaOH solution (50% v/v in water-ethanol mixture)) were measured using UV-visible spectroscopy (Schimadzu UV-3600 UV-VIS-NIR spectrophotometer). Photocurrent measurements and electrochemical impedance spectra (EIS) were measured were carried out using a XES-151 S solar simulator (San-Ei, Japan) under Standard Solar Spectra AM1.5 G conditions. Incident photon-to-current conversion efficiency (IPCE) was measured with an IPCE evaluation system for dye-sensitized solar cells (Bunkoh-Keiki Co. Ltd., CEP-2000). Electrochemical impedance spectra (EIS) were measured by a BAS-Zahner IM6e impedance analyzer (Germany) under 1 Sun illumination at an applied bias of open-circuit voltage.

Neutron powder diffraction (NPD) data were collected on the high intensity powder diffractometer, Wombat, at the Open Pool Australian Light-water (OPAL) reactor facility at the Australian Nuclear Science and Technology Organisation (ANSTO).<sup>1</sup> The sample was placed in a 6 mm vanadium can and data were collected for 5 minutes between  $30 \leq 2\theta \leq 130^\circ$  using  $\lambda = 1.5407(1) \text{ \AA}$ , with the wavelength determined using the NIST 676  $\text{Al}_2\text{O}_3$  standard reference material. Wombat has a 2D detector allowing data to be collected over the entire  $2\theta$ -range in one acquisition. Rietveld refinements were carried out using the GSAS<sup>2</sup> suite of programs with the EXPGUI interface.<sup>3</sup> To account for absorption in the NPD data, the Lobanov and Alte da Veiga absorption correction<sup>4</sup> was applied to the Rietveld model.

ESI-2

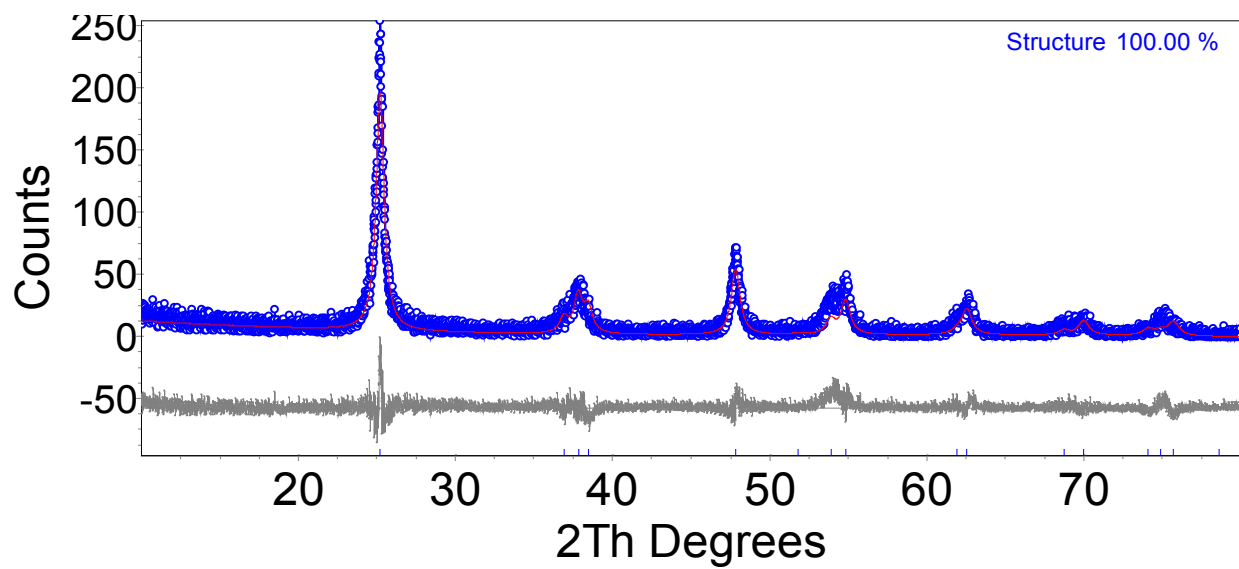

XRPD pattern of the  $\text{TiO}_2$  nanoparticles obtained by the molten salt method. Symbols are the experimental data and red line is the model calculation.

**ESI-3**

| Materials            | $J_{sc}$ (mA/cm <sup>2</sup> ) | $OCV$ (V)  | Fill factor (%) | Efficiency (%) |
|----------------------|--------------------------------|------------|-----------------|----------------|
| P25                  | 12.36±0.1                      | 0.75±0.01  | 65±0.5          | 6.03±0.2       |
| MSM TiO <sub>2</sub> | 14.48±0.1                      | 0.765±0.01 | 67.5±0.5        | 7.48±0.2       |

I-V parameters of solar cells with different electrodes (based on 5 devices for each material)

**ESI-4**

| Thickness of electrodes | $J_{sc}$ (mA/cm <sup>2</sup> ) | $OCV$ (V)  | Fill factor (%) | Efficiency (%) |
|-------------------------|--------------------------------|------------|-----------------|----------------|
| 9 $\mu$ m               | 11.87±0.1                      | 0.765±0.01 | 67.5±0.5        | 6.13±0.2       |
| 11 $\mu$ m              | 13.38±0.1                      | 0.765±0.01 | 67.5±0.5        | 6.91±0.2       |
| 13 $\mu$ m              | 14.48±0.1                      | 0.765±0.01 | 67.5±0.5        | 7.48±0.2       |
| 15 $\mu$ m              | 14.05±0.1                      | 0.75±0.01  | 66±0.5          | 6.95±0.2       |

I-V parameters of MSM TiO<sub>2</sub> electrodes with different thickness

ESI-5

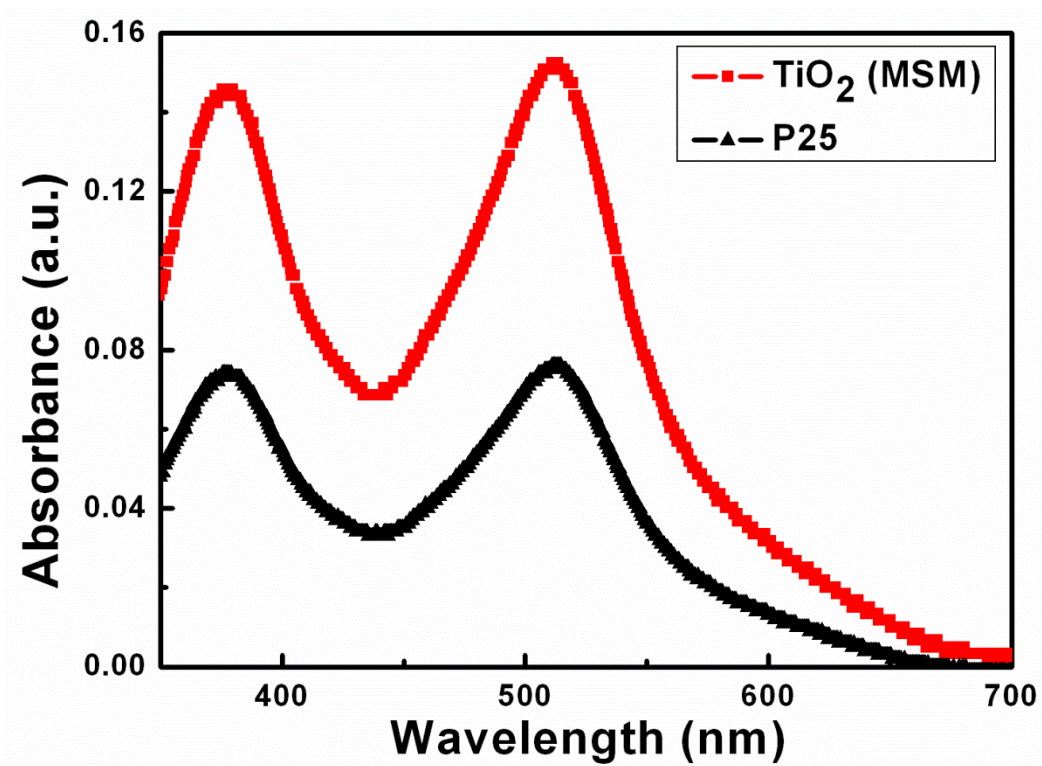

UV-Visible spectra of the solutions containing desorbed dyes from the electrodes

ESI-6

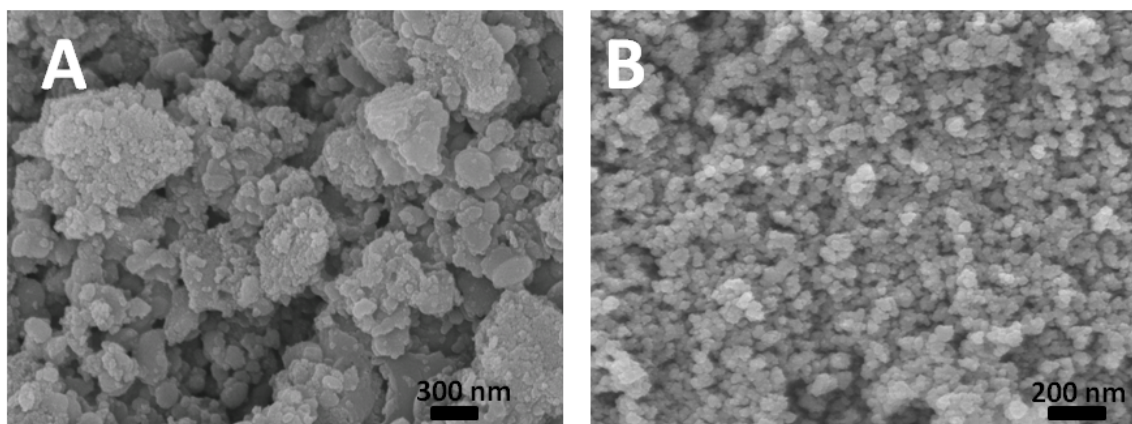

Fig. A shows the SEM image of the TiO<sub>2</sub> obtained using the molten salt method. The TiO<sub>2</sub> nanoparticles were agglomerated into aggregates with sizes ranging from 100 to 500 nm. Fig. B shows the respective image of P-25 TiO<sub>2</sub>.



ESI-7

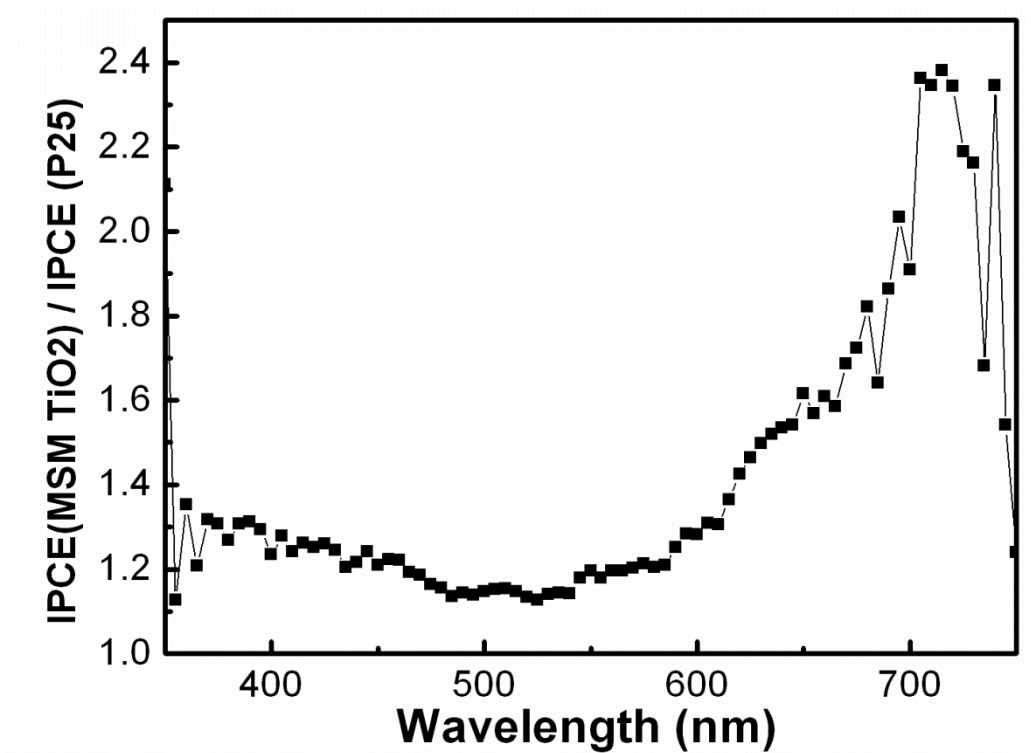

Plot of  $IPCE_{(MSM TiO_2)} / IPCE_{(P25)}$

ESI-8

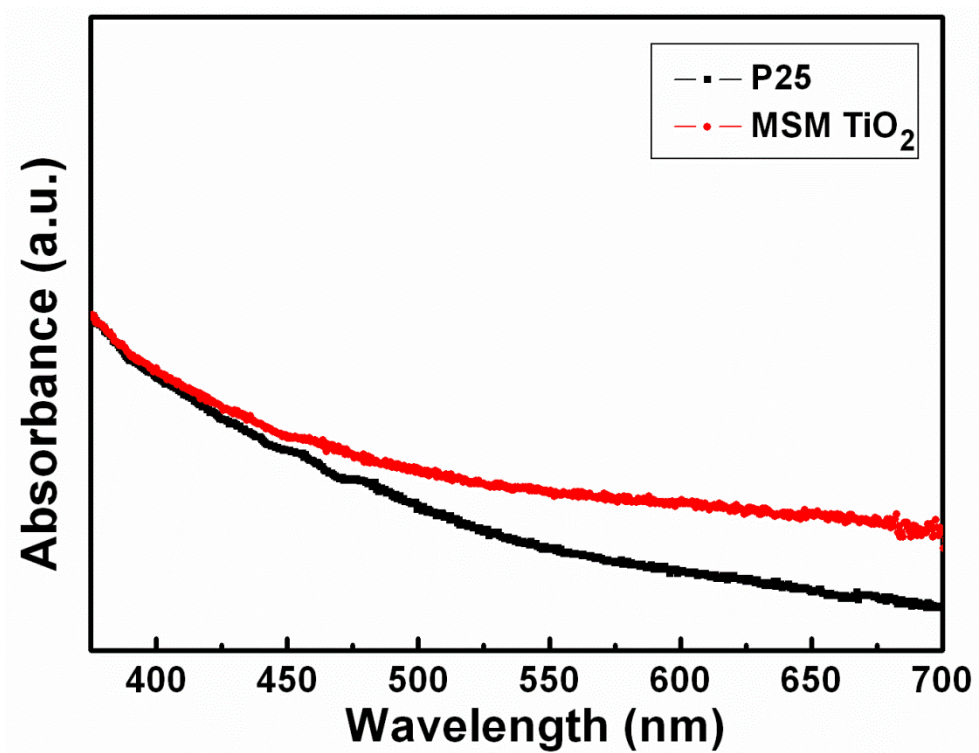

UV-visible spectra of MSM TiO<sub>2</sub> and P25 TiO<sub>2</sub> electrodes (the traces are normalized with respect to the absorbance at 375 nm)

## ESI-9

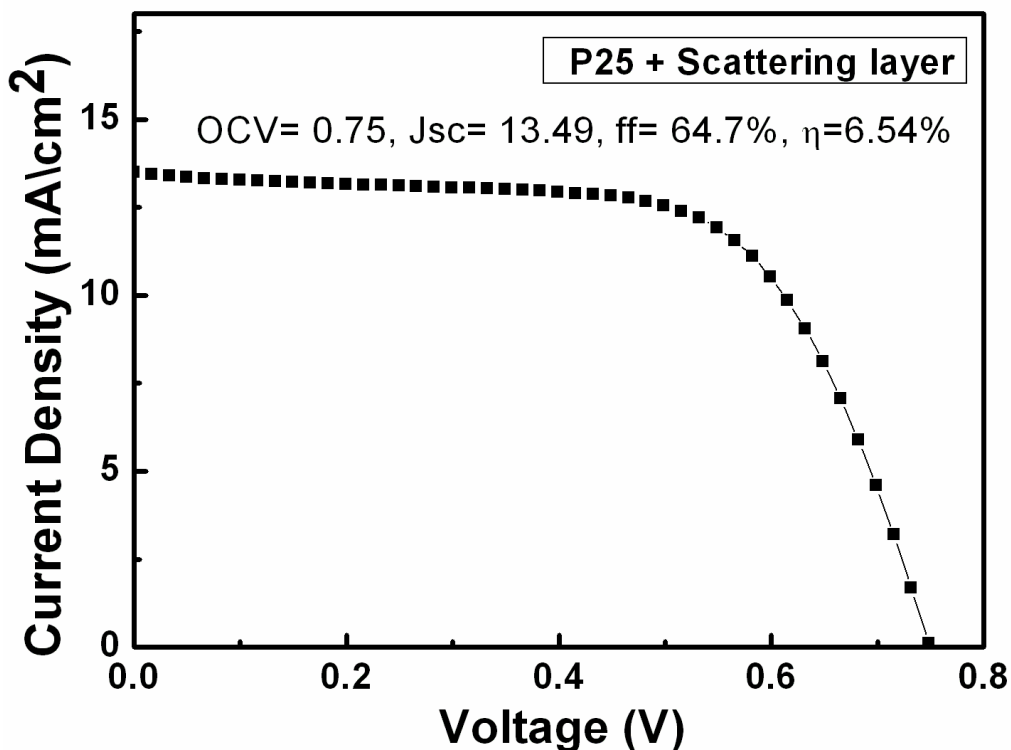

Photocurrent-photovoltage characteristic curves of double layer electrode of P25 with a TiO<sub>2</sub> scattering layer.

## References

1. A. J. Studer, M. E. Hagen and T. J. Noakes, *Physica B: Condensed Matter*, 2006, **385**, 1013-1015.
2. A. C. Larson and R. B. Von Dreele, *General Structure Analysis System. LANSCE, MS-H805, Los Alamos, New Mexico*, 1994.
3. B. H. Toby, *Journal of Applied Crystallography*, 2001, **34**, 210-213.
4. N.N. Lobanov, L.A.d. Veiga, presented at the Sixth European Powder Diffraction Conference August 22-25 (1998).
